# Supplementary material for: Transcranial Direct Current Stimulation Enhances Cognitive Function in Patients with Mild Cognitive Impairment and Early/Mid Alzheimer’s Disease: A Systematic Review and Meta-Analysis
Source: MDPI journal article supplement (doi:10.3390/brainsci12050562), 2022-04-27
Supplement: s1 [file s1]

## Supplementary Figures

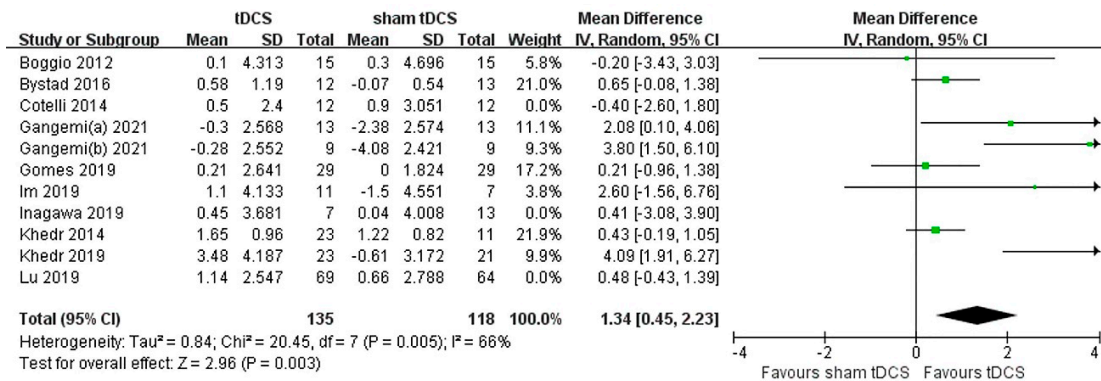

**Figure.S1** Forest plots of MMSE score mean change from baseline after studies involving cognitive training were ignored.

| _ES               | Coef.      | Std. Err. | z     | P> z  | [95% Conf. Interval] |           |
|-------------------|------------|-----------|-------|-------|----------------------|-----------|
| stimulation site  | -1.759324  | 0.922292  | -1.91 | 0.056 | -3.566983            | 0.0483349 |
| No.stimulations   | 1.533834   | 0.8543189 | 1.8   | 0.073 | -0.1406007           | 3.208268  |
| current density   | 0.0716145  | 0.4098593 | 0.17  | 0.861 | -0.731695            | 0.8749239 |
| degree of disease | -0.1302518 | 1.177349  | -0.11 | 0.912 | -2.437813            | 2.177309  |
| _cons             | 0.7323193  | 3.304232  | 0.22  | 0.825 | -5.743857            | 7.208496  |

**Figure.S2** Meta-regression analyses of MMSE.

a

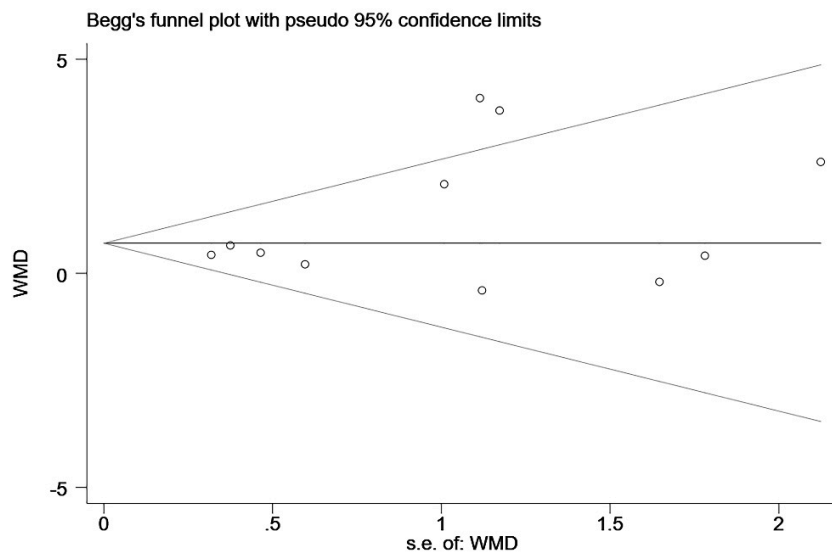

b

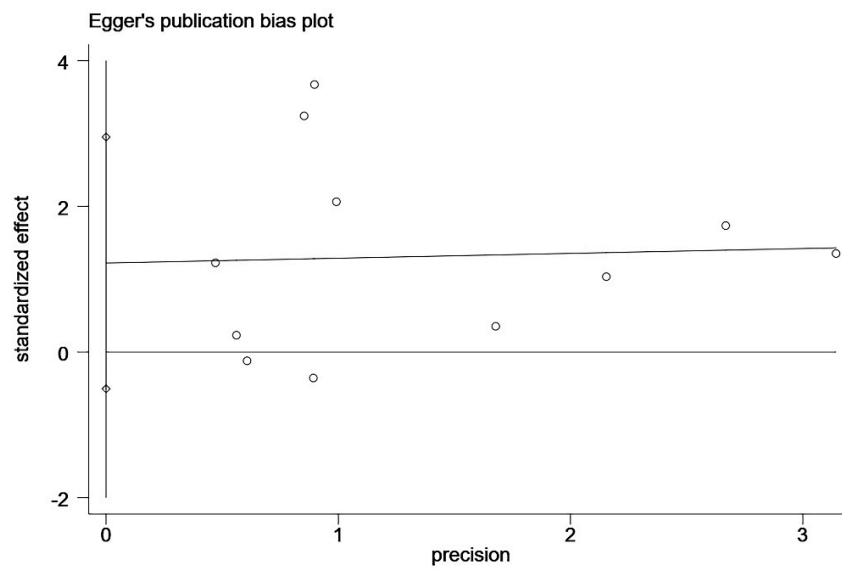

**Figure.S3** Potential publication bias detection results. (a) the Begg's funnel plot, (b) the Egger's publication bias plot.
